# Supplementary material for: Overview of the field measurement campaign in Hyytiälä, August 2001 in the framework of the EU project OSOA
Source: Copernicus journal article supplement (doi:10.5194/acp-4-657-2004), 2004-04-27
Supplement: Supplementary file 1 [file acp-4-657-2004-supplement.pdf]

## **Corrigendum to “Overview of the field measurement campaign in Hyytiälä, August 2001 in the frame of the EU project OSOA” published in Atmos. Chem. Phys., 4, 657–678, 2004**

**M. Boy et al.**

Dept. of Physics, University of Helsinki, P.O. Box 64, FIN-00014, Finland (UHEL)

The authors regret that in the above article the following error occurred:

Page 669, Figs. 13b, c, d, e, and f: The units of concentration for the photooxidation products should have appeared as  $\text{ng/m}^3$  (nanograms per cubic meter).

---

*Correspondence to:* M. Boy  
([michael.boy@helsinki.fi](mailto:michael.boy@helsinki.fi))
